# Supplementary material
Source: publisher figshare collection journal article supplement (https://acs.figshare.com/ndownloader/files/26046500)
Supplement: Supplementary file 1 [file 26046500]

**Supporting Information For:**

**Antioxidative properties and chemical changes of quercetin in fish oil: quercetin reacts with free fatty acids to form its ester derivatives**

Shaojun Liu<sup>1,2</sup>, Yamin Zhu<sup>1,2</sup>, Ning Liu<sup>1,2</sup>, Daming Fan<sup>3</sup>, Mingfu Wang<sup>1,2,4,\*</sup>,  
Yueliang Zhao<sup>1,2,\*</sup>

<sup>1</sup> College of Food Science and Technology, Shanghai Ocean University, Shanghai, 201306, China

<sup>2</sup> Laboratory of Quality and Safety Risk Assessment for Aquatic Products on Storage and Preservation (Shanghai), Ministry of Agriculture, Shanghai 201306, China

<sup>3</sup> School of Food Science and Technology, Jiangnan University, Wuxi, China

<sup>4</sup> School of Biological Sciences, The University of Hong Kong, Pokfulam Road, Hong Kong, China

To whom correspondence should be addressed:

\*Dr. Mingfu Wang, School of Biological Sciences, The University of Hong Kong,

E-mail: [mfwang@hku.hk](mailto:mfwang@hku.hk)

\*Dr. Yueliang Zhao, College of Food Science and Technology, Shanghai Ocean

University, E-mail: [yueliang2110@163.com](mailto:yueliang2110@163.com), [ylzhao@shou.edu.cn](mailto:ylzhao@shou.edu.cn)

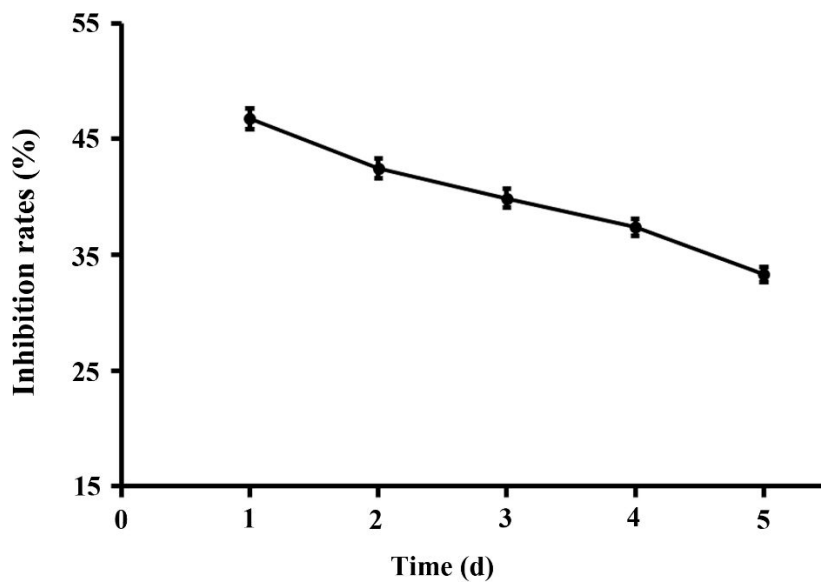

Figure S1 The Inhibition rate (%) of quercetin on the formation of total aldehydes in fish oil after heating at 60 °C for 1-5 days.  $\text{Inhibition rate (\%)} = (C_{\text{control}} - C_{\text{quercetin}}) / C_{\text{control}} \times 100$ , Where  $C_{\text{control}}$  is content of total aldehydes in the fish oil without quercetin,  $C_{\text{quercetin}}$  is content of total aldehydes in the fish oil with quercetin. Values are mean  $\pm$  standard deviation, n = 3.

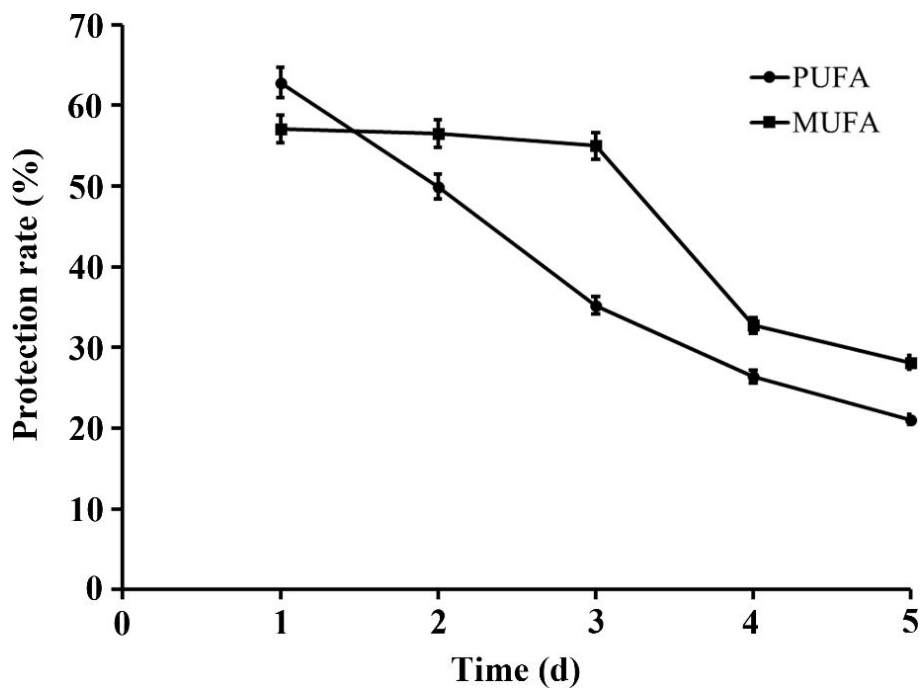

Figure S2 The protection rate (%) of quercetin on MUFA and PUFA in fish oil after heating at 60 °C for 1-5 days.  $\text{Protection rate (\%)} = (C_{\text{quercetin}} - C_{\text{control}}) / (C_0 - C_{\text{control}}) \times 100$ , Where  $C_{\text{control}}$  is content of PUFA and MUFA in the fish oil without quercetin,  $C_{\text{quercetin}}$  is content of PUFA and MUFA in the fish oil with quercetin,  $C_0$  is content of PUFA and MUFA on day 0. Values are mean  $\pm$  standard deviation, n = 3.

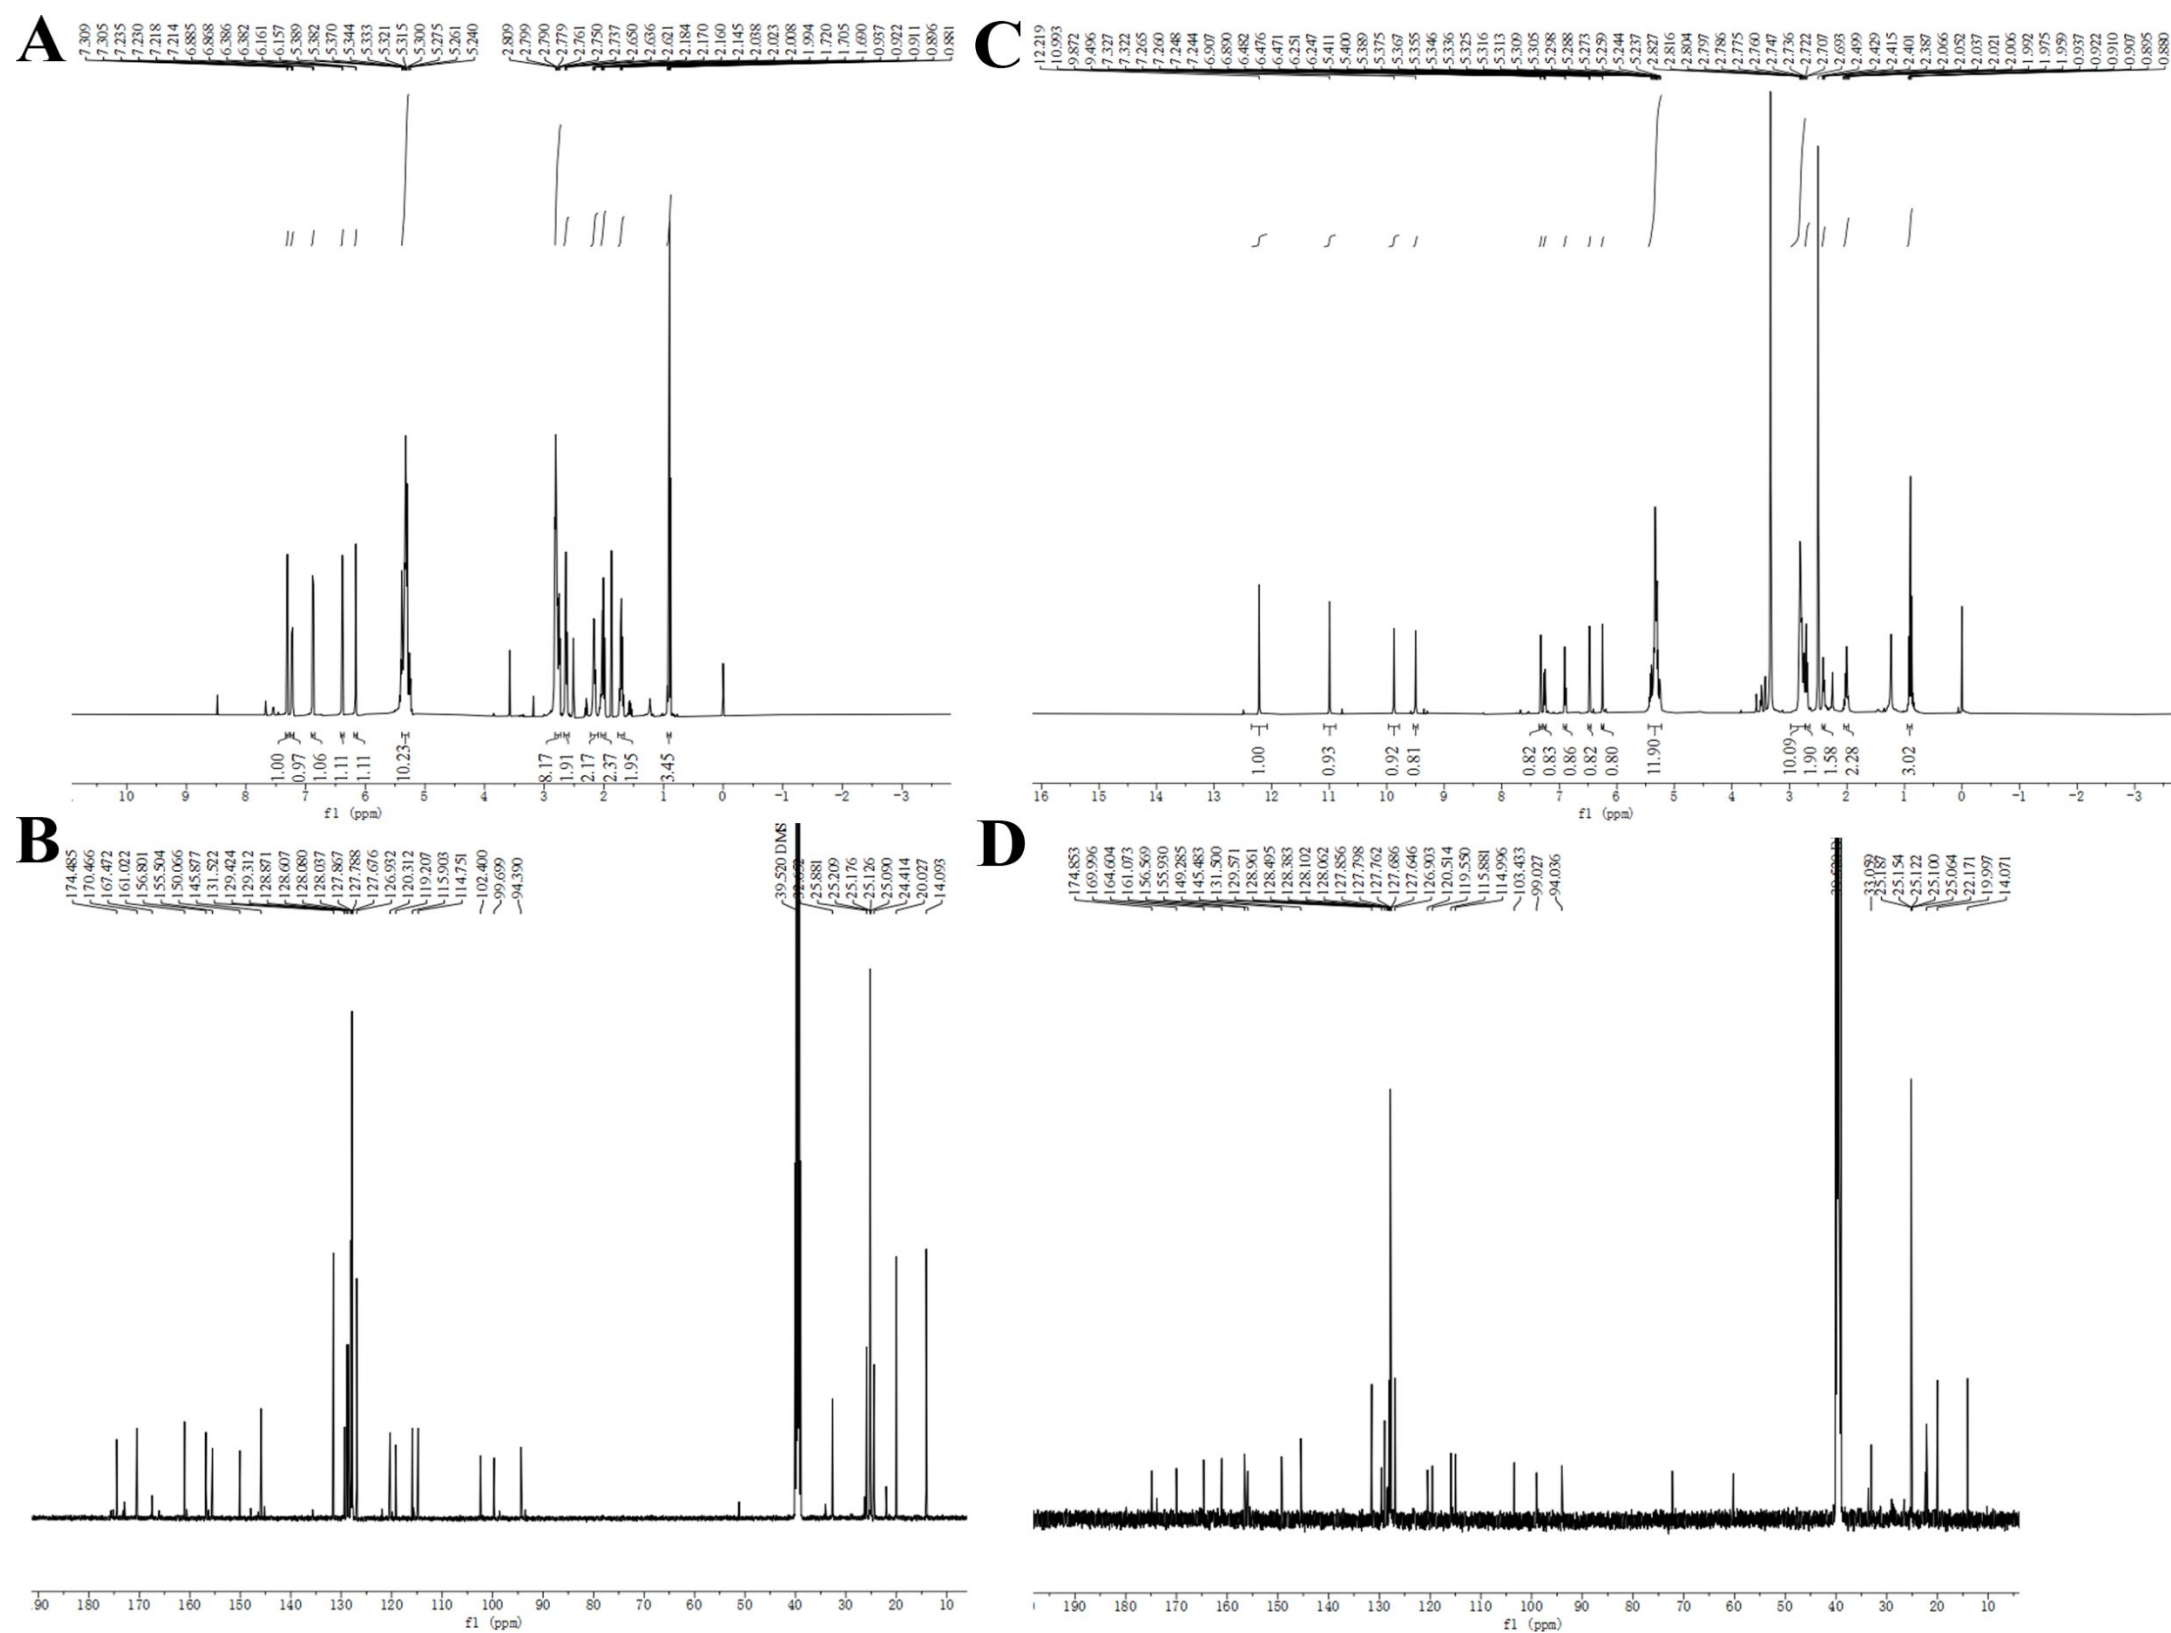

Figure S3  $^1\text{H}$  NMR spectrum of (A) quercetin-3-O-eicosapentaenoate and (C) quercetin-3-O-docosaehaenoate (in  $\text{DMSO}-d_6$ , 600 MHz).  $^{13}\text{C}$  NMR spectrum of (B) quercetin-3-O-eicosapentaenoate and (D) quercetin-3-O-docosaehaenoate (in  $\text{DMSO}-d_6$ , 150 MHz).

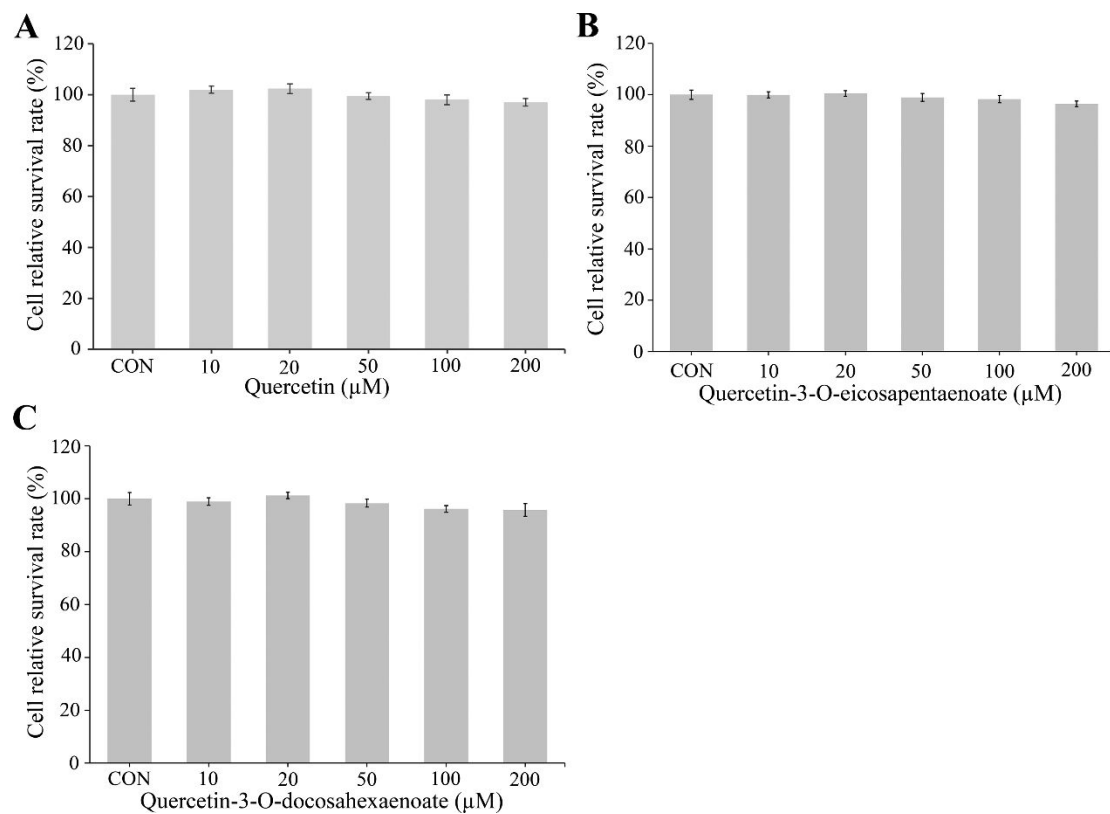

Figure S4 Viability of HepG2 cells treated with (A) quercetin, (B) quercetin-3-O-eicosapentaenoate, (C) quercetin-3-O-docosahexaenoate at different concentrations for 1 h at different concentrations for 1 h. Values are mean  $\pm$  standard deviation,  $n = 3$ .
